# Supplementary material
Source: PubMed Central journal article supplement (PMC5533092)
Supplement: NIHMS880968-supplement-supplement_1.pdf [file NIHMS880968-supplement-supplement_1.pdf]

# SUPPLEMENTAL MATERIAL

## Supplemental Figure Legends

### Online Figure I.

(A) Pulse field gel electrophoresis of linearized recombinereered BAC DNA. Recombineered BAC DNA was linearized with *Ascl*, followed by purification with column fractionation. Fraction 4 (Lane 3) was injected into pronuclei.

(B) Probe design for Southern blotting of CyclinA2-LacZ-EGFP BAC transgenic line. Short DNA sequence of BAC vector arm adjacent to linearized *Ascl* site was used as probe.

### Online Figure II.

Fluorescence microscope images of CyclinA2-LacZ-EGFP MEFs in each S/G2 (a1-3), Metaphase (b1-3), and Telophase (c1-3). MEFs were immunostained with anti- $\beta$ -gal antibody, anti-S10pH3 and staining with DAPI. Note cytosolic dispersion of CyclinA2- $\beta$ gal in metaphase (b2), and its disappearance in telophase (c2). Scale bar: 20 $\mu$ m.

### Online Figure III.

Quantitative analysis of CyclinA2-EGFP or /and EdU positive myocardial cells. Heart tissue sections of ED10.5 were stained for CyclinA2-EGFP, Troponin T, EdU, and DAPI. Cardiomyocytes were defined by Troponin T staining.

### Online Figure IV.

Quantitative analysis of CyclinA2-EGFP myocardial cells at PN14, 16, 18, and 20. Heart tissue sections were stained for CyclinA2-EGFP, PDGFR $\alpha$ , CD31, CD45, CD146, EdU, and DAPI. The number of myocardial nuclei was defined by excluding cells labeled by PDGFR $\alpha$ , CD31, CD45, or CD146. Note gradual and steady decrease throughout these stages.

### Online Figure V.

(A) Fluorescence microscopy images of PN15 heart sections from Protamine-Cre;CyclinA2-EGFP mice, stained for CyclinA2-EGFP, Troponin T, and EdU. Note CyclinA2-EGFP cells co-localized with EdU staining (white circles). Scale bar: 50 $\mu$ m.

(B) X-gal staining of PN15 heart sections from CyclinA2-LacZ-EGFP mice. Scattered CyclinA2- $\beta$ -gal positive cells were observed in LV wall (black circles). Scale bar: 50 $\mu$ m.

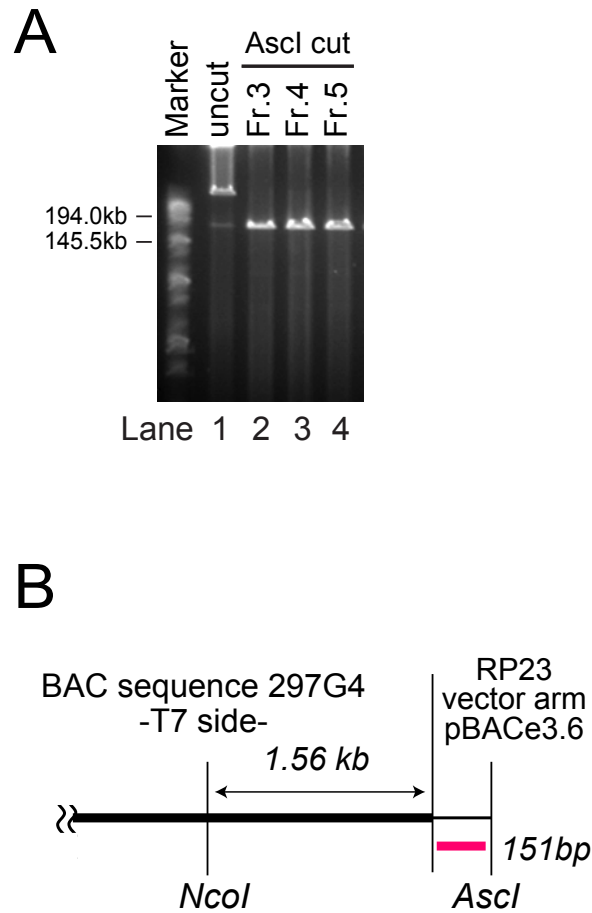

Online Figure I.

(A) Pulse field gel electrophoresis of linearized recombiner BAC DNA. Recombiner BAC DNA was linearized with *AsclI*, followed by purification with column fractionation. Fraction 4 (Lane 3) was injected into pronuclei.

(B) Probe design for Southern blotting of CyclinA2-LacZ-EGFP BAC transgenic line. Short DNA sequence of BAC vector arm adjacent to linearized *AsclI* site was used as probe.

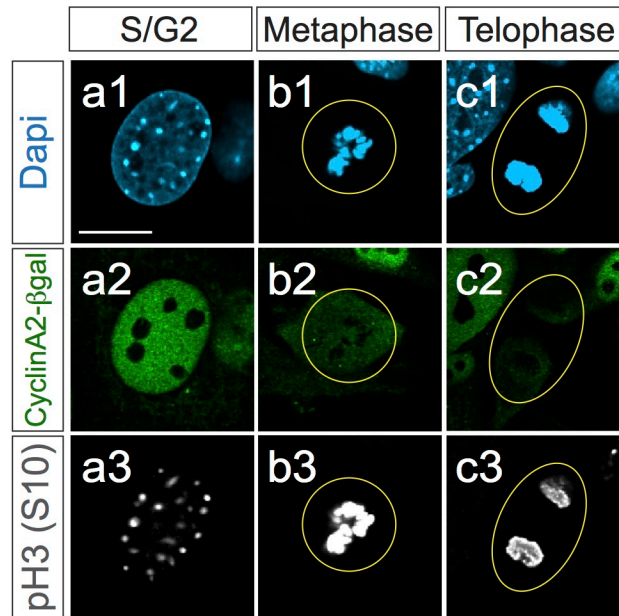

## Online Figure II.

Fluorescence microscope images of CyclinA2-LacZ-EGFP MEFs in each S/G2 (a1-3), Metaphase (b1-3), and Telophase (c1-3). MEFs were immunostained with anti-β-gal antibody, anti-S10pH3 and staining with DAPI. Note cytosolic dispersion of CyclinA2-βgal in metaphase (b2), and its disappearance in telophase (c2). Scale bar: 20μm.

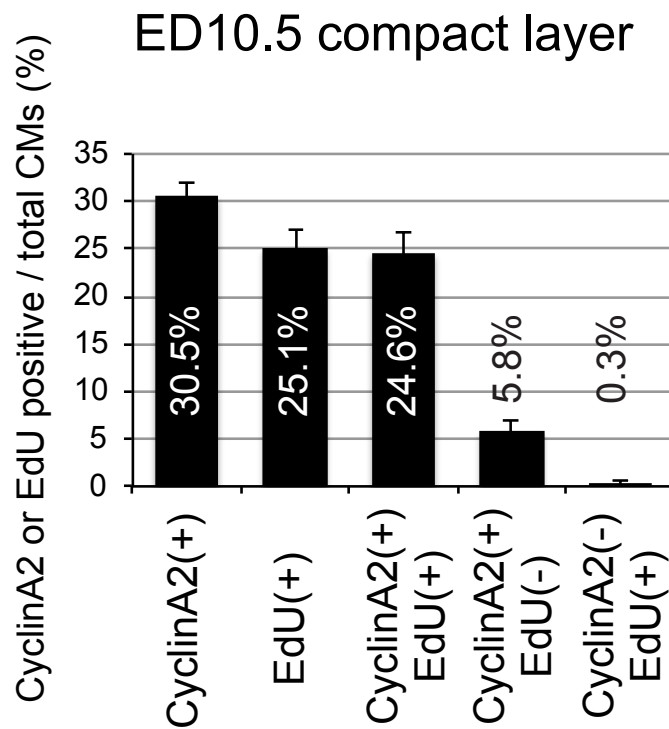

Online Figure III.

Quantitative analysis of CyclinA2-EGFP or /and EdU positive myocardial cells. Heart tissue sections of ED10.5 were stained for CyclinA2-EGFP, Troponin T, EdU, and DAPI. Cardiomyocytes were defined by Troponin T staining.

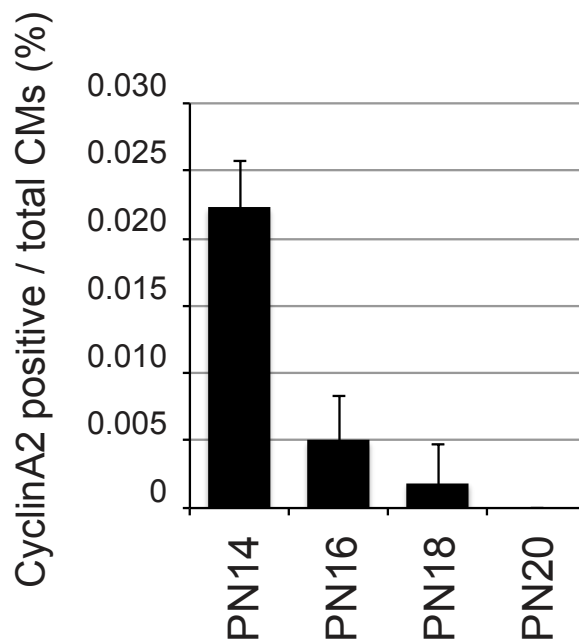

Online Figure IV.

Quantitative analysis of CyclinA2-EGFP myocardial cells at PN14, 16, 18, and 20. Heart tissue sections were stained for CyclinA2-EGFP, PDGFR $\alpha$ , CD31, CD45, CD146, EdU, and DAPI. The number of myocardial nuclei was defined by excluding cells labeled by PDGFR $\alpha$ , CD31, CD45, or CD146. Note gradual and steady decrease throughout these stages.

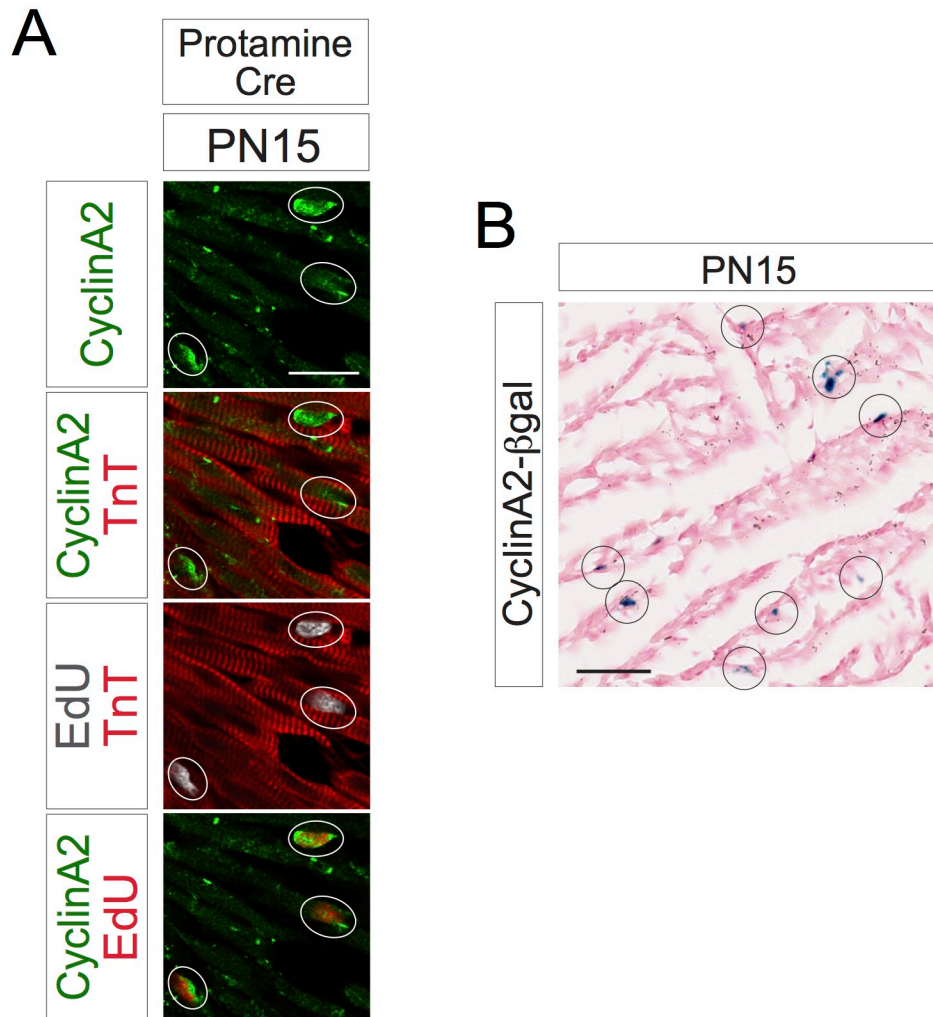

Online Figure V.

(A) Fluorescence microscopy images of PN15 heart sections from Protamine-Cre;CyclinA2-EGFP mice, stained for CyclinA2-EGFP, Troponin T, and EdU. Note CyclinA2-EGFP cells co-localized with EdU staining (white circles). Scale bar: 50 $\mu$ m.

(B) X-gal staining of PN15 heart sections from CyclinA2-LacZ-EGFP mice. Scattered CyclinA2- $\beta$ -gal positive cells were observed in LV wall (black circles). Scale bar: 50 $\mu$ m.
